# Supplementary material for: Assembling gold nanobipyramids into chiral plasmonic nanostructures with DNA origami
Source: Royal Society of Chemistry journal article supplement (doi:10.1039/d1cc01925b), 2021-01-01
Supplement: d1cc01925b1.pdf [file d1cc01925b1.pdf]

## Electronic Supplementary Information for

### Assembling Gold Nanobipyramids into Chiral Plasmonic Nanostructures by DNA Origami

Jinyi Dong,<sup>abcd</sup> Yihao Zhou,<sup>ae</sup> Jiahao Pan,<sup>ae</sup> Chao Zhou <sup>\*ae</sup> and Qiangbin Wang <sup>\*abe</sup>

- CAS Key Laboratory of Nano-Bio Interface, Division of Nanobiomedicine and i-Lab, Suzhou Institute of Nano-Tech and Nano-Bionics, Chinese Academy of Sciences, Suzhou 215123, People's Republic of China.
- School of Physical Science and Technology, ShanghaiTech University, Shanghai 201210, People's Republic of China.
- Shanghai Advanced Research Institute, Chinese Academy of Sciences, Shanghai 201210, People's Republic of China.
- University of Chinese Academy of Sciences, Beijing 100049, People's Republic of China.
- School of Nano-Tech and Nano-Bionics, University of Science and Technology of China, Hefei 230026, People's Republic of China.

## Experimental section

### 1. Materials

Gold chloride trihydrate ( $\text{HAuCl}_4 \cdot 3\text{H}_2\text{O}$ , >99%) was purchased from Sinopharm Chemical Reagent Co, Ltd (Shanghai, China). Cetyltrimethylammonium bromide (CTAB, >99%), sodium dodecyl sulfate (SDS), citric acid (>99%), cetyltrimethylammonium chloride (CTAC, 97%) were obtained from Sigma Aldrich. Sodium borohydride ( $\text{NaBH}_4$ , 99%), 5-Bromosalicylic acid (5-BrSA), silver nitrate ( $\text{AgNO}_3$ ), tris(2-carboxyethyl) phosphine (TCEP) was purchased from Alfa Aesar. Non-thiolated DNA sequences were bought from GENEWIZ Suzhou, China. Thiolated DNA sequences of HPLC grade were bought from Sangon Biotech (shanghai) Co.,Ltd. The p8064 DNA scaffold DNA was purchased from tilibit nanosystems ® GmbH (Garching, Germany). All reagents were used as received without further purification. All solutions were prepared using ultrapure water (18.2 M $\Omega$ ).

### 2. Synthesis of the AuNRs<sup>1</sup>

The seed solution for AuNRs was prepared firstly. A 50  $\mu\text{L}$  amount of 50 mM  $\text{HAuCl}_4$  was mixed with 10 mL of 0.1 M CTAB solution. A 0.6 mL portion of fresh cold 0.01 M  $\text{NaBH}_4$  was diluted to 1 mL with water and was then injected into the Au(III) CTAB solution under vigorous stirring (1200 rpm). The solution color changed from yellow to brownish-yellow, and the stirring was stopped after 2 min. The seed solution was aged at 25 °C for 30 min before use. To prepare the growth solution, 1.8g of CTAB together with 0.22g 5-BrSA were dissolved in 50 mL of warm water (50-70 °C). The solution was allowed to cool to 30 °C, when a 1.2 mL of 4 mM  $\text{AgNO}_3$  solution was added. The mixture was kept undisturbed at 30 °C for 15 min, after which 50 mL of 1 mM  $\text{HAuCl}_4$  solution was added. After 15min of slow stirring (400 rpm), 0.4 mL of 64 mM ascorbic acid was added, and the solution was vigorously stirred for 30 s until it became colorless. Finally, specific volume of seed solution (adjusting the volume according to desirable LSPR wavelength) was injected into the growth solution. The resultant mixture was stirred for 30 s and left undisturbed at 30 °C for 12 h for AuNR growth. The reaction products were isolated by centrifugation at 8000 g for 30min followed by removal of the supernatant and the precipitates were re-dispersed in water.

### 3. Functionalization of the AuNRs<sup>2</sup>

Thiolated DNA strands were incubated with TCEP [tris(2-carboxyethyl) phosphine] for at least 1 h to reduce the disulfide bonds. The ratio of DNA:TCEP was 1:200. Before functionalization, the AuNRs were spun down and then resuspended with ultrapure water (18.2 M $\Omega$ ·cm) to remove excess cetyl trimethylammonium bromide (CTAB). AuNRs (1 nM, 500  $\mu$ L) were mixed with H<sub>2</sub>O (150  $\mu$ L), 0.2% sodium dodecyl sulfate (SDS, 100  $\mu$ L), 10 $\times$ TBE (50  $\mu$ L), 1M HCl (50  $\mu$ L, pH=3) and 250mM thiolated DNA strands (10  $\mu$ L). NaCl (5 M, 10  $\mu$ L) was added every 20 min for 9 times. Subsequently, 1M NaOH (50  $\mu$ L) was added to adjust the pH value back to 8. Finally, the concentration of NaCl reached 500 mM. The AuNRs functionalized with DNA were purified to remove excess free DNA strands by centrifugation before use.

### 4. Synthesis of the AuNBPs<sup>3</sup>

Initial gold seeds were prepared in a scintillation vial (20 mL) by fast reduction of HAuCl<sub>4</sub> (10 mL, 0.25 mM) with freshly prepared NaBH<sub>4</sub> (0.25 mL, 25 mM) in an aqueous CTAC solution (50 mM), in the presence of citric acid (5 mM) under vigorous stirring at room temperature. The mixture turned from light yellow to brownish indicating the formation of gold seeds. After 2 minutes, the vial was closed and the seed solution was heated in an oil bath at 80 °C for 90 minutes under gentle stirring, leading to a gradual color change from brown to red. Finally, the thermally treated seed solution was removed from the bath and stored at room temperature.

Synthesis of the AuNBPs can be done using Eppendorf tubes (1.5 mL) when the seeds have cooled to RT. For each tube, specific volume of seed solution is added, followed by 1 mL of growth solution. The growth solution (quantity for six simultaneous tests) is made by mixing 6 mL of 46.5 mM CTAB, 60  $\mu$ L of 25 mM HAuCl<sub>4</sub>, 55  $\mu$ L of 5 mM AgNO<sub>3</sub>, and finally 85  $\mu$ L of 0.4 M ethanolic HQL. The Eppendorf tubes are then mixed and heated at 40 °C in an oven for 1 h. Upon UV spectrum analysis, good seed batches are characterized by an LSPR-to-TSPR ratio of at least 5, preferably 6 or 7, and an LSPR between 700 and 800 nm (the lower the better).

### 5. Design, Preparation, Purification, and Characterization of DNA Origami Template

The DNA origami templates are designed by CaDNAno. For preparing the DNA origami template structures, 15 nM of the p8064 scaffold and a staple mixture containing 150 nM of each staple type were used. All DNA strands were mixed in ultrapure water (18.2 M $\Omega$ ·cm) together with 12 mM MgCl<sub>2</sub> and 5 mM NaCl in 0.5 $\times$  TE buffer. The mixture was then annealed as follows: 85 °C for 5 min; from 65 to 61 °C, -1 °C/5 min; from 60 to 51 °C, -1 °C/60 min; from 51 to 38 °C, -1 °C/20 min; from 37 to 26 °C, -1 °C/10 min; held at 25 °C. The DNA origami was purified by gel electrophoresis (1% agarose) in an ice bath. The target bands were cut and extracted by Bio-Rad Freeze'N Squeeze spin columns.

### 6. Gel purification and recycle of the self-assembled plasmonic nanostructures

Under visible light, the target bands are cut down carefully, and placed it on a flat plate wrapped with parafilm, then the gels are cut into small pieces. With a glass slide wrapped with parafilm, the small gel pieces are carefully squeezed to generate solutions. At last the squeezed solution are collected (avoid collecting gel particles) as sample solution.

### 7. Effective radius<sup>4</sup>

$R_{\text{eff}} = (3V/4\pi)^{1/3}$ .  $R_{\text{eff}}$  is the radius of a sphere having a volume, V, equal to that of the nanorod. In addition to cross section, it is also useful to consider the efficiencies of extinction, absorption, and scattering.

For 41 nm  $\times$  18 nm AuNBP,  $V=2900.61 \text{ nm}^3$ ,  $R_{\text{eff}}=8.848\text{nm}$ .

For 34 nm  $\times$  11 nm AuNR,  $V=2881.16 \text{ nm}^3$ ,  $R_{\text{eff}}=8.828\text{nm}$ .

## 8. Anisotropy factor

The g-factor, also known as the anisotropy factor, was calculated using:

$$g = \frac{CD \text{ (in mdeg)}}{33000 * Absorbance}$$

Both the CD and the absorbance were measured simultaneously by the CD spectrometer.

## 9. Characterization

The absorption spectra of the DNA origami templates and the AuNBPs were measured by using Thermo Scientific UV-vis Spectrometer. The concentration of the DNA origami template structures after purification at 260 nm. The CD spectra were collected on an Applied Photophysics Chirascan-plus CD spectrometer. The measurement was carried out at the wavelength range of 400-900 nm at 25 °C in a 10 mm length cell. All the products were diluted to 100 µL in 0.5×TBE-Mg<sup>2+</sup>. The scanning speed is 100 nm/min. For DNA input strands, to achieve rapid and complete reactions, the molar ratio of the origami and the input DNA strands was kept to be 1:500. The CD spectra were measured 2 min after additions of input DNA strands at 25 °C. Tecnai G2 F20 S-Twin TEM (200 kV) and Hitachi HT7700 TEM (100 kV) were used for TEM imaging. The purified samples were dropped on Glow-discharge grid for 20 seconds upon staining the samples with 0.75% uranyl formate for 20 seconds. liquid was excessed from the edge of the grid by filter paper edge and left for 30mins to completely dry the grid before injecting into the TEM.

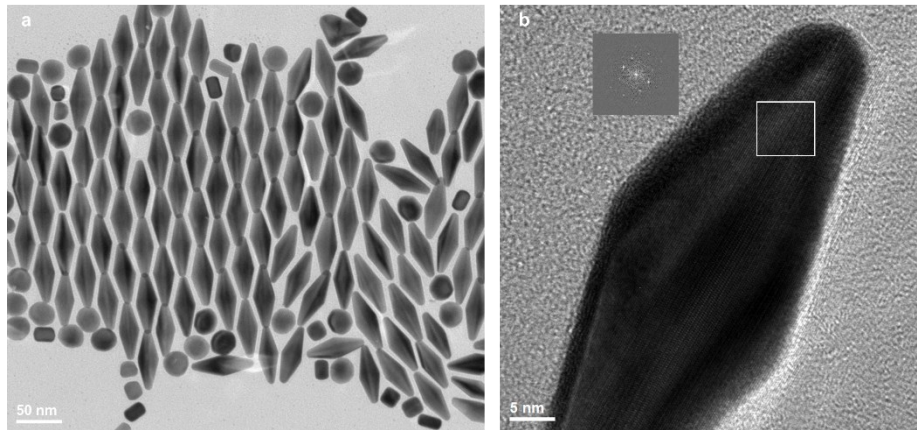

Fig. S1. (a) zoom out and (b) high-resolution TEM image of Au NBP.

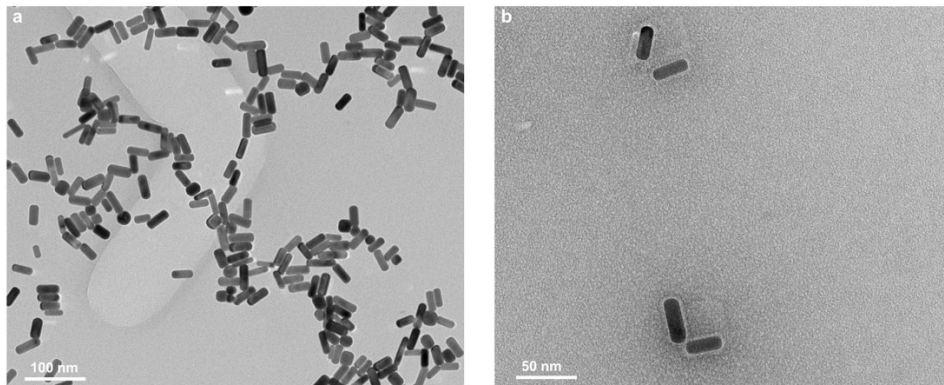

Fig. S2 TEM images of 672-nm AuNR (a) and "L" type AuNR dimer (b).

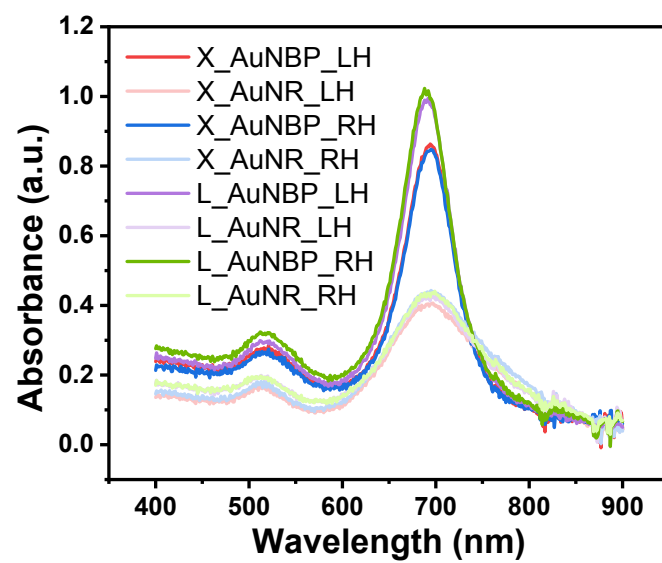

Fig. S3. UV-Vis absorption spectra of AuNBP and AuNR dimers.

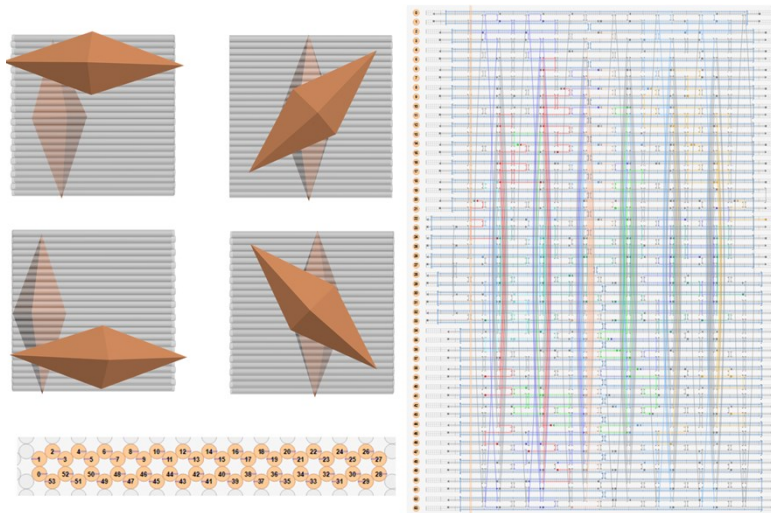

Fig. S4. Scheme of the DNA origami template for static chiral structures designed by caDNAno software.

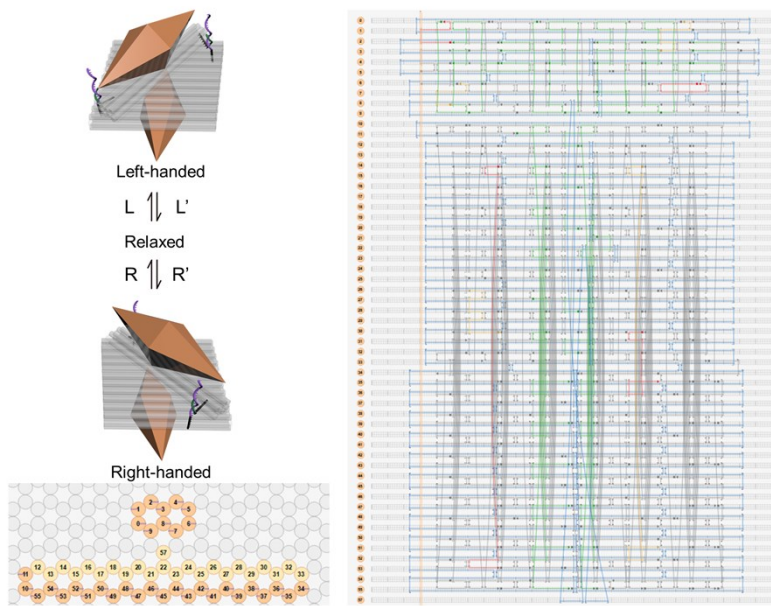

Fig. S5. Scheme of the DNA origami template for reconfigurable chiral plasmonic structure designed by caDNAno software.

**Table S1.** Staple strands of DNA origami for static structure

| Start   | End     | Sequences 5'-3'                     | Length |
|---------|---------|-------------------------------------|--------|
| 0[161]  | 53[167] | TTTTTTGAGGAAGGGAATTTTTT             | 23     |
| 12[55]  | 10[42]  | GCGAGAGGCTTTTGCATAGTATCAGTTG        | 28     |
| 29[119] | 27[132] | CAGTATAGCATTTCATGTTCAGCTAAT         | 28     |
| 26[139] | 28[126] | AAAATAAGCAGAACTAATTTAGGCAGAG        | 28     |
| 49[119] | 51[132] | CATCACGCAAATTAGATTTTACGAGCAC        | 28     |
| 24[55]  | 30[42]  | AGACAGTTCATTGCGCCAGTTTGAGGGG        | 28     |
| 28[167] | 29[153] | TTTTTTCATATTTAACAACGCGCTTAAT        | 29     |
| 31[0]   | 30[14]  | TTTTTTGCCAGCTTCCGGCACGGAAGAT        | 29     |
| 33[0]   | 32[14]  | TTTTTTCAGGGTTTTCCAGTCTTAAGTT        | 29     |
| 30[167] | 29[167] | TTTTTTTTGAAATATGAGAATCGTTTTTT       | 30     |
| 32[167] | 31[167] | TTTTTTAGGTCTGAGATTTAATGGTTTTTT      | 30     |
| 34[167] | 33[167] | TTTTTTATGGAAACACAAAATCATTTTTTT      | 30     |
| 36[167] | 35[167] | TTTTTTACGGATTCGCCTTTTTTATTTTTT      | 30     |
| 38[167] | 37[167] | TTTTTTGTTTGGATTGAAACAATATTTTTT      | 30     |
| 40[167] | 39[167] | TTTTTTCAACTCGTAATCCTGATTTTTTTT      | 30     |
| 42[167] | 41[167] | TTTTTTATCAATATCACAATTCGATTTTTT      | 30     |
| 44[167] | 43[167] | TTTTTTGCCATTAAAAAACCCCTCATTTTTT     | 30     |
| 46[167] | 45[167] | TTTTTTCAGATTCACTAAAACATCTTTTTT      | 30     |
| 48[167] | 47[167] | TTTTTTATAACATCATTACATTGGTTTTTT      | 30     |
| 50[167] | 49[167] | TTTTTTGCGGGAGCTTGATTAGTATTTTTT      | 30     |
| 52[167] | 51[167] | TTTTTTGAAAGCGAAAGAATCAGATTTTTT      | 30     |
| 9[6]    | 10[6]   | TTTTTTAGAAGTGGCAACTAATGCTTTTTT      | 30     |
| 11[6]   | 12[6]   | TTTTTTAGATACATAGGGTAATAGTTTTTT      | 30     |
| 13[6]   | 14[6]   | TTTTTTTTAAAATGTTCCTGACTATTTTTT      | 30     |
| 15[6]   | 16[6]   | TTTTTTTTTATAGTCAATTAGAGAGTTTTTT     | 30     |
| 17[6]   | 18[6]   | TTTTTTTACCTTTAACATTCCATATTTTTT      | 30     |
| 19[6]   | 20[6]   | TTTTTTTAAACAGTTGATTCTACTATTTTTT     | 30     |
| 3[6]    | 4[6]    | TTTTTTCACTAAAACGAACGAGGCTTTTTT      | 30     |
| 5[6]    | 6[6]    | TTTTTTGCAGACGGTTCATTACCCTTTTTT      | 30     |
| 7[6]    | 8[6]    | TTTTTTAAATCAACGCGGATTTTATTTTTT      | 30     |
| 23[14]  | 24[0]   | GGATAAAGTTCTAGCTGATAAATTAATTTTTT    | 32     |
| 25[14]  | 26[0]   | TAGCTATATCAGAAAAGCCCCAAAAATTTTTT    | 32     |
| 27[0]   | 28[0]   | TTTTTTCAGGAAGATTGTCATCAACATTTTTTT   | 33     |
| 25[0]   | 30[0]   | TTTTTTTCCGGAGAGGGCGCACTCCATTTTTT    | 33     |
| 23[0]   | 32[0]   | TTTTTTATTTCAACGCAAGGGTAACGCTTTTTT   | 33     |
| 2[164]  | 1[161]  | TTTTTTTTTTTGCTAAACATTTTCGAGGTTTTTTT | 33     |
| 1[3]    | 2[6]    | TTTTTTCATCGGAACGAGAAAAGAATATTTTTT   | 33     |
| 52[132] | 1[125]  | GGCAAGTGGGGAAACGATAGTTGCGCCGCTTTAAT | 35     |
| 52[90]  | 1[83]   | CGCGCCATAAATCGAACCGATATATTCGCATCACG | 35     |
| 45[77]  | 10[84]  | ATTCGTATGTGGTGCCACCGGAACCGCCAAACAA  | 35     |

|         |         |                                      |    |
|---------|---------|--------------------------------------|----|
| 47[91]  | 10[98]  | CAACAGGAAAAACGACCCTTCGGAAAGCGCCTTG   | 35 |
| 43[77]  | 12[84]  | CCTGTGCTGCTCGTTCCAATGAAACCATAACCAGAG | 35 |
| 41[77]  | 14[84]  | AAAGGTTCCACGCATCAAAGGGCGACATCGGAAAC  | 35 |
| 39[77]  | 16[84]  | GTGGTGCTTCGTCTTACTGGCATGATTAGCGCCAA  | 35 |
| 37[77]  | 18[84]  | CGGTCCGCTCATTGCCCCACAAGAATTTACCCAA   | 35 |
| 38[125] | 19[118] | CCTACCAAACGTAGCAGAAGGAAACCGAGCAAGAA  | 35 |
| 22[48]  | 19[55]  | TACCAAATACAGGCTGGGGCGTAGATTTAGTTTGA  | 35 |
| 35[126] | 20[119] | ATTACATGTTACAAAATCGCGACAATGACCTGAAC  | 35 |
| 37[98]  | 20[91]  | GATTTTCTCATTTCGCCAATATTGAGCGCTAATA   | 35 |
| 36[118] | 21[125] | CAGAGGCAGAAAACAAAATTAACCTTGAAAATAG   | 35 |
| 24[139] | 21[132] | TAGCAAGCAAATCATTGCTATTTTCCAGCAGCCTT  | 35 |
| 36[62]  | 21[55]  | GGCGGTTCCATTAGGCTATATTTTCATTAAGGCAA  | 35 |
| 33[105] | 22[98]  | TAGCGATAAATCGTCGCTATTTTTGTTAATAAAC   | 35 |
| 26[34]  | 29[27]  | TACCCCGAAATTGTGGCCTTCCTGTAGCACAACCC  | 35 |
| 26[97]  | 29[90]  | TCAATAAATTCTGTAAAGTACCGACAAGGGTTTA   | 35 |
| 6[55]   | 3[48]   | CTTCATCAAGAGTAGACCAACCCGCGACATTATAC  | 35 |
| 22[83]  | 31[76]  | TCCCAAAGCCTCAGAGGTAAATGCGGGCCGCAACT  | 35 |
| 24[97]  | 31[90]  | GAACGCGAAGAACGTAGAAAAAGCCTTGAGATCGC  | 35 |
| 22[97]  | 33[90]  | AGCCATATTGCGGGGATGCAAATCCAGGAACCTTAG | 35 |
| 31[119] | 34[126] | AAATATATTTTAGTGCTTAGGCGCTGAGAGTGAAT  | 35 |
| 19[140] | 34[133] | TCTTACCACGGGAGAATTAACCTACAGAGATATGTG | 35 |
| 20[132] | 35[139] | TGAACACAATAGCAATAGCTAATACCAATTAACAA  | 35 |
| 18[83]  | 35[76]  | AAGAATAATGCTGTTTCGCAAAGCCGCAATCAAAC  | 35 |
| 16[83]  | 37[76]  | AGACAGCGTTTTAATGCTGAACGTCGCTGCAAACG  | 35 |
| 35[140] | 38[147] | TTTCATTTGAATTACCTGATTATCGGGAATACTTC  | 35 |
| 14[118] | 39[125] | CCAGTAGGGTAAATGTTTGTAGATCATATTCCTGAT | 35 |
| 36[55]  | 39[48]  | GTGTACATCGACATAAGTTAAATCCTCACAGCAAC  | 35 |
| 14[83]  | 39[76]  | GTCACAAATGCTTTTCAAATAACCAGCTACCGTCG  | 35 |
| 53[140] | 4[133]  | AACGTGGGGCGCTAATGAATTTAGGAACCCATGTA  | 35 |
| 12[83]  | 41[76]  | CCACCAGACGACGAATCCCCCATAAACAATGGGT   | 35 |
| 10[34]  | 43[41]  | GGAATACAAGGAATGGGTTTCGGTGCCGGTGCCCC  | 35 |
| 10[83]  | 43[76]  | ATAAAGAACAACATTCGTTTACTGCGCCTGCGCG   | 35 |
| 10[55]  | 45[48]  | AGATTCAAGAGCAACCGTTTTACGGTCCCTCACA   | 35 |
| 8[83]   | 45[76]  | CTGCCTAGTAAATTGAACTAAAGCTGTTAGCTCGA  | 35 |
| 7[133]  | 46[140] | CAAGAGAAGAACTCCAATCGTCTGAAATACGACCA  | 35 |
| 6[83]   | 47[76]  | TACTCACCAGGCGCCAGAACGTCGGGAAGTTGCGC  | 35 |
| 8[97]   | 47[90]  | ACAGTTACCAGAATTGACCTGAAAGCCACCCATTG  | 35 |
| 45[98]  | 48[105] | GGCACAGACAATATAGATAGACTCATGGATATCCA  | 35 |
| 5[133]  | 48[140] | AGAGCCATTAAAGGACCGTTGTAGCAATGAGTAGA  | 35 |
| 45[140] | 48[147] | CGAACTGATAGCCCCAGTCACGGATTATCTTGCTT  | 35 |
| 9[42]   | 48[49]  | TGGGAAGCAACTTTGAATAAGGCTTGCCCTGCATT  | 35 |

|         |         |                                             |    |
|---------|---------|---------------------------------------------|----|
| 46[48]  | 49[55]  | GCTCACAAATGAGTAATGAATTCTTTTCACCAGTG         | 35 |
| 6[97]   | 49[90]  | TAGGTGTTATTATTATTACCGCCAGCGCCGAATCA         | 35 |
| 1[98]   | 52[91]  | AAAAAAGTAAAGGAATTGCGATAGTTAGCACCCGC         | 35 |
| 51[140] | 6[133]  | GTGCTTTAGGCCGACCACCCTCCAGGCGGATAAGT         | 35 |
| 49[77]  | 6[84]   | CCTTCACTTTCCAGAGTATTTTCGGAACCATCACCG        | 35 |
| 51[91]  | 6[98]   | GCGCCGCTACAGGGTCTGAGCCCTCAGCCCGGAA          | 35 |
| 47[77]  | 8[84]   | TCACTGCTGGTCATCGTCCTCATTAAAGATGCCCC         | 35 |
| 49[91]  | 8[98]   | GTGAGGCCACCGAGGAACAATCTGAAACCGTATAA         | 35 |
| 18[34]  | 35[41]  | GTGTCTGATTCTGCTCCCGTAGAAGGGATAGCTCT         | 35 |
| 35[42]  | 21[62]  | CACGGAAAAAGAGACGCAGAAACGTACAAGAATTA         | 35 |
| 12[164] | 11[164] | TTTTTTTCATCGGCATTTCCGCCACCAGAACTTTTTT       | 36 |
| 14[164] | 13[164] | TTTTTTACCGACTTGAGCTGTAGCGGTTTTTTTTT         | 36 |
| 16[164] | 15[164] | TTTTTTGAAACGCAAAGAATTATCACCGTCTTTTTT        | 36 |
| 18[164] | 17[164] | TTTTTTAAGAAAAGTAAGCAACATATAAAAATTTTTT       | 36 |
| 24[164] | 23[164] | TTTTTTGAATCATTACCGCAATTTTATCCTTTTTTT        | 36 |
| 26[164] | 25[164] | TTTTTTAGATAAGTCCTGTTTTTCATCGTAGTTTTTT       | 36 |
| 4[164]  | 3[164]  | TTTTTTTAGCAAGCCCAATTCTGTATGGGATTTTTT        | 36 |
| 35[10]  | 36[10]  | TTTTTTTTTCTCCGTGGTAAAAAAGCCGCATTTTTT        | 36 |
| 37[10]  | 38[10]  | TTTTTTCAGGCGGCCTTTGGACTGTAGAATTTTTT         | 36 |
| 39[10]  | 40[10]  | TTTTTTCGTCAGCGTGGTCTTTCGCACTCATTTTTT        | 36 |
| 41[10]  | 42[10]  | TTTTTTATCCGCCGGGCGGATGCCGGGTATTTTTT         | 36 |
| 43[10]  | 44[10]  | TTTTTTCCTGCAGCCAGCTGCCAGCACGCGTTTTTT        | 36 |
| 45[10]  | 46[10]  | TTTTTTTGCTGTTCTTCACGAGCCGGAAGTTTTTT         | 36 |
| 47[10]  | 48[10]  | TTTTTTCATAAAGTGTAAGGAGAGGCGGTTTTTTTT        | 36 |
| 6[164]  | 5[164]  | TTTTTTTTTTGCTCAGTACATTTTCAGGGATTTTTT        | 36 |
| 49[10]  | 50[10]  | TTTTTTTGCGTATTGGGCATCCTGTTTGATTTTTTT        | 36 |
| 51[10]  | 52[10]  | TTTTTTGGTGGTCCGAAAACCGTCTATCATTTTTT         | 36 |
| 8[164]  | 7[164]  | TTTTTTAGGAGTGTACTGGGATTAGCGGGGTTTTTT        | 36 |
| 10[164] | 9[164]  | TTTTTTCACCACCAGAGCTTTTGATGATACTTTTTT        | 36 |
| 43[109] | 14[119] | GCAAATGAAAAATCTAAGGAATTGAGAATCAAAAATCA      | 38 |
| 41[88]  | 16[98]  | CAACTAATAGATTAGAGATCATTTATTGAGGCATATGG      | 38 |
| 29[140] | 27[164] | CAGTAGGCAACATGGCGCCTGTTTATCAACAATTTTTT      | 39 |
| 21[6]   | 22[0]   | TTTTTTATAGTAGTATTTTGCGGGAGAAGCCTTTTTTTTT    | 40 |
| 44[102] | 42[91]  | ATTAAGAGCCGCTCAAAATCACCGACGATAGCTTTAGGA     | 40 |
| 50[48]  | 0[35]   | GGTTTGCTTATAAACTCCAACCACCCAACCGCTTTTGCGGGA  | 42 |
| 51[56]  | 0[56]   | AATAGCCCGAGATATCCACTAGGTCGAGAGGCTTGCAGGGAG  | 42 |
| 4[69]   | 0[70]   | CCTGATAAGTACAATAAAAATACATGAGGAAGTTTCGTCGCTG | 42 |
| 48[34]  | 10[35]  | CGCGCGGAGCCTGGGGTGCCTATTCCACAGGACGTAGATTTA  | 42 |
| 42[90]  | 13[104] | GCACTTACCAGTGCCACGCTGAGAGCCAAATATCAGCACCG   | 42 |
| 43[56]  | 15[55]  | CCAGCGCACACTGGTAAATATTCAGAAAACGAGAATAAGAGG  | 42 |
| 41[112] | 16[112] | TAGATAATACATTTTTTAAAAATTGACGTGTCACAATCAATA  | 42 |



|         |         |                                                   |    |
|---------|---------|---------------------------------------------------|----|
| 20[76]  | 16[63]  | CAATAACCTGTTTAATACATTAGCTCAAGCTTAATTTTCGAGC       | 42 |
| 20[118] | 17[118] | AAAGTCAGAGGGTAAATAAGAGGAAACGGCAGTATGTTAGCA        | 42 |
| 40[55]  | 18[56]  | TCCAGCACGCAAGAATGCCAATCCGGCCGCTTAGACATGTTT        | 42 |
| 53[70]  | 2[84]   | GTGCCGTAAAGCACGTTTGGATTAGACAGCCCTCAATAATAA        | 42 |
| 35[77]  | 20[77]  | TTAAATTCACCGGTAATCCAAATAAGATCAGAGAGATAAGT         | 42 |
| 25[105] | 21[118] | AACCAAGATCCGGTGAAGCCTGTTACAATAACGTCAAAAATG        | 42 |
| 33[70]  | 22[84]  | CCACGGGAACGGATCGATCGGGAGAACCTCCCGACTTATTTA        | 42 |
| 31[35]  | 23[48]  | GAAACCAACGACGACAAAAGGCTATCAGGCAAATCATTTTAA        | 42 |
| 29[56]  | 25[69]  | GATTGACGGAACGCATTTCGCATTAATAACGGTATCTGGAG         | 42 |
| 29[91]  | 26[105] | GTATCATATGCGTTGAGAATACCAGACGACGACAACATGTAG        | 42 |
| 51[119] | 3[132]  | GCTTTGAGACAGGAGAACCGCCACCCTCCCGTAACCCAGACG        | 42 |
| 24[118] | 32[105] | AAGGCTTTACCGCAAAACACCGGAATCAGAGAAAATATATGT        | 42 |
| 31[140] | 34[140] | ATCTTCTGACCTAAAGACTACAATTTATGTACATAAATCAAT        | 42 |
| 24[69]  | 34[70]  | GTGAGAAAATGTGTAGCATAAGCAAAATTAAGCAAAAACAAT        | 42 |
| 31[56]  | 35[69]  | CGCCATTCAGGCTGCTCTTCGGGAGCCGCGGCGAAACAGCGG        | 42 |
| 16[139] | 36[140] | GAATAAGATACATATGGAAGGACAGTACCTTTTACGCTTTGA        | 42 |
| 16[62]  | 37[62]  | TTCAAAGCGAACCAGCGGATGAGAGCACACGATGCTGATTGC        | 42 |
| 16[97]  | 39[97]  | TTTACCAAGACTCCAAACAGAAAATAATTCAAAACCACCAGAA       | 42 |
| 53[119] | 4[105]  | GCTTGACGTAGCGGCGTCTTTACTGAGTTTCGTCACCAGTAC        | 42 |
| 50[83]  | 4[70]   | TGGCCCTAGAGGAGGTTTAGTGTAGCATTCCACGTATCATCG        | 42 |
| 42[41]  | 40[28]  | CGTTAACTCCAATAAAAATCAAAAATCAGAGCGGATGCAGGCG       | 42 |
| 16[111] | 42[112] | GAAAATTGAGGGAACACCATTTAATCAGTAGCGACAGGAAGG        | 42 |
| 9[140]  | 43[139] | ACATGGCCGCCGCCAGCATTGACCACCCACCAGCCCTTGCT         | 42 |
| 41[126] | 45[139] | GAGGATTGTTGAAAAGCATCAAGAAGATTAGTCTTTAATGCG        | 42 |
| 53[35]  | 5[34]   | GAACCATGTCAAAGCCCAGCGCTGCTCCATGTTACAAGGGAA        | 42 |
| 2[83]   | 51[83]  | TTTTTTTAAACGGGCGGAGATACAAGAGGGGTTGAGTGTGT         | 42 |
| 1[84]   | 52[98]  | TTGAAAATCTCCAACACGCATGAACCCTAAAGGGAACCACCA        | 42 |
| 51[35]  | 7[34]   | AAATCCCCCAGCACCGAACTATCTTGACAAGAACGCTGCTC         | 42 |
| 50[34]  | 8[35]   | GCGGAAAGCCAGGGTGGTTTTTCGGCAAATTCAGTAATCATT        | 42 |
| 48[132] | 9[118]  | AAACTATCGGCCTTAGGCTGAAGTGCCTTGAGTAACTGAATT        | 42 |
| 12[34]  | 9[34]   | AGTTTTGCCAGAGGACGCCAACACATTCTCATTATACCAGTC        | 42 |
| 49[56]  | 9[55]   | AGACGGGTGCCAGCTGACGAAGATGGTTAATTTAAAAATC          | 42 |
| 31[42]  | 21[41]  | GGCAAAGGGCGAAACAGTGCCGTTTACCAGTCCCGTAAATCA        | 42 |
| 29[0]   | 27[27]  | TTTTTTTAAATGTGAGCGAGTACAGCTTTATAAGCAAATATTT       | 43 |
| 53[10]  | 0[3]    | TTTTTTGGGCGATGGCCCCCTCAGCAGCGAAAAGACAGTTTTTT      | 43 |
| 20[149] | 21[164] | TAGGAAGCCCTTTTTTTTTTTTTTTTTTTGAAGCACAGGTTTTTT     | 43 |
| 20[23]  | 37[34]  | TCAATCCCAGAAGTTTTTGCTCCTTTGATACGTGCCAGTGATG       | 45 |
| 8[107]  | 49[118] | GCCATGAAAGAGTATAGAACCGCCACCCTCAACGGTACGTCTGTC     | 45 |
| 8[65]   | 49[76]  | TTGAAAACACATAGGCTGATGAACGGTGTACGAGAGAGTGATTGC     | 45 |
| 30[27]  | 34[10]  | GGCCTCACGCTTCTAAGGCGAACGACGTTGAGAGATAGACTTTTTT    | 46 |
| 49[147] | 0[140]  | ACTTCTTAAACAGGCCTCGTTAGGAGCGCGAGAAAATTTCTTAAACAGC | 49 |

|         |         |                                                    |    |
|---------|---------|----------------------------------------------------|----|
| 49[105] | 0[98]   | TAAAAGAGCCAGAACGCGTACGCGCTAGCCCCGCAACAACCATCGCC    | 49 |
| 36[69]  | 15[62]  | GCAGTTGCGTTCCGGGCAGCCCCGGCAGCTACGGCTGGAGGTGAAGCCCG | 49 |
| 24[76]  | 28[70]  | CAAAAGGCAAACAAGCGCATCGGATAGGTCACGTTAAGCTCATTITTTTA | 49 |
| 8[34]   | 3[27]   | GTGAATTACCTTATTAACAAACGGATATCAATCATTAGCCGACTCATC   | 49 |
| 37[35]  | 34[28]  | AAGGGTAAAAAAGAACGAGCGAGCTGAAAAGGTCATCCAAGAATTTG    | 49 |
| 38[118] | 40[126] | TATCAAAACGTCAGATGAATATACAGTAGTTAGAATATCAGATATTAAT  | 49 |
| 43[140] | 40[133] | GAACCTCTTGCAAGTCAGACCATTTGGGAATTAGTTCATTACGAACGT   | 49 |
| 12[139] | 42[147] | TAGCCCCCTTAGCATCAACATAGAAGTATTAGACTTTACAATGGTCAG   | 49 |
| 16[34]  | 42[28]  | TCCAACAGGTCAGGGAAGCAAGTCTTATAGACTGGATAGCGGGCATCA   | 49 |
| 7[140]  | 47[132] | AGGATTAGTAATAAGTTTTAAGCGTCATGTAATAAAAGGGACTGACGCT  | 49 |
| 46[55]  | 48[63]  | GTTATCCGTTGAGGATCCCCGGGTACCGTCTGTGTAATTGCACCTGTC   | 49 |
| 53[56]  | 50[49]  | TTTTTGGTTAAAGAGAAAACAAAATTGTGTGCGAAATTTGAAACCACGCT | 49 |
| 3[98]   | 51[90]  | CGTAACGAAACTACAACGCTACCGCCAAAGTGTTTTATCCTCTTAAT    | 49 |
| 6[118]  | 9[125]  | TGATATATATTAAGGCTGGTAAAATACCTACATTTATTCTGGTACCGTT  | 49 |
| 47[49]  | 10[56]  | GAGCTAACTCACATTGAAATTTACGTTAGGTAGAA                | 35 |
| 15[63]  | 12[56]  | AAAGACTAAACAGTTCATTGATAAAAACCAAATA                 | 35 |
| 41[28]  | 16[35]  | CGTTGCGGTATGAGGTCATTTGCATCAAGCAAAC                 | 35 |
| 39[28]  | 18[35]  | GCTGGTCTGGTCAGTAACGGAAGAGGTAAGTACG                 | 35 |
| 49[63]  | 6[56]   | CAACAGCTTGCAGCAAGCGGTGAGGACAGGCTGAC                | 35 |
| 44[60]  | 8[66]   | GCGGGCACTATCATAACCCTATTACAATAAAACGGGC              | 37 |
| 18[55]  | 14[45]  | TAAATATGCAACTACATTTTTGACCGGAAAAAGATTGAC            | 39 |
| 24[34]  | 20[24]  | TATGATATTCAACCAATTTTTGTAATACGCATTAAGGCA            | 39 |
| 46[34]  | 12[35]  | ACAACATGCGTCCGTGAGCCTATACCGGTACGAGGCAAAAGA         | 42 |
| 22[164] | 20[150] | TTTTTTGAATCTTACCAACATAAAAGCAT                      | 29 |
| 43[147] | 12[140] | AAATATCAATACCGAACGAACTCAGAGCTCGGTCA                | 35 |
| 39[147] | 16[140] | CAATATATTAATCCTTTGCCAAGGTGACACCACG                 | 35 |
| 39[133] | 18[140] | TGATGGCAATTCATTGAATAAAAGGTGGCAGATAG                | 35 |
| 9[126]  | 6[119]  | CCAGTAACGGGGTCGACTCCTGCCGTCGAGAGGGT                | 35 |
| 14[128] | 10[119] | AGCAGTTTGCCTTATTACAGAGCCACAGGAGTTGAGG              | 38 |
| 18[139] | 14[129] | CCGAACAAAGTTACAAAATACTTTATTTGAAATTAAGCC            | 39 |
| 12[118] | 8[108]  | CCATCTTTTCATAACACCCTCGACGATTGCAGTCTCAGT            | 39 |
| 46[118] | 12[119] | CCAACAGTTTTGAATGGCTATAAAACAGCCACCCTGCGTTTG         | 42 |
| 26[55]  | 29[55]  | AACTAGCTGTAAACATCAAAAATAATTGGGAACAAACGGCG          | 42 |
| 26[118] | 29[118] | TTACGAGTAAACAACGAGCCAGTAATAAATACAAATTCCTAC         | 42 |
| 22[41]  | 31[34]  | AACATTATGACCCTAGAACCCGTGCTGCGGTGCCG                | 35 |
| 22[62]  | 31[55]  | AGCTAAATCGGTTGTGCAATGGCCAGCTCGCCATT                | 35 |
| 22[125] | 31[118] | AGCCTAATTTGCCATAAATCAATATAACCTTTTTTC               | 35 |
| 21[140] | 31[139] | AGAATAACGCTAACGAGCGTCTTGCACACCTCCGTAATTC           | 42 |
| 1[35]   | 51[34]  | CAGAGGCCCAACCTAAAACGATTTGACCGGCGAAAATCGGCA         | 42 |
| 1[56]   | 51[55]  | ACTTTTTCGTAATGCCACTACCAAGCGCACGTGGATCAAAAG         | 42 |
| 2[125]  | 51[118] | GTGAGAATAGAAAGTTTTGTTACGCTTATGGTT                  | 35 |

|         |         |                                               |    |
|---------|---------|-----------------------------------------------|----|
| 1[140]  | 51[139] | AGCTTGCACTTCAACAGTTTTTAGTAAGGGCGCTGTATAAC     | 42 |
| 2[48]   | 53[55]  | GAAGGCATTTGAGGACTAAAGTTAAAGGATCAAGT           | 35 |
| 3[105]  | 53[118] | ATCTAAAGAACAACGCTCCAAAAGGAGACAATGAATTTAGA     | 42 |
| 26[27]  | 29[34]  | GTTGATATTTGAGAGATCTACAGTATCGTCGGAT            | 35 |
| 26[132] | 29[139] | TATCCCAAGAACAAGCAAGCCAATAAGGGCGCTCAA          | 35 |
| 2[27]   | 53[34]  | AAGAGGCGGTAGCAACGGCTATCGTCACACTACGT           | 35 |
| 2[132]  | 53[139] | CAGCGGATGTATCGGTTTATCTTGATACGCCGGCG           | 35 |
| 14[104] | 41[87]  | ACCATTAGCAAGGCTCAACCGTGCGGAACAAAGTCTCAA       | 39 |
| 14[44]  | 41[55]  | CATCTGCGGAATCGTCATGTGTTCCACTGTT               | 31 |
| 40[48]  | 43[55]  | TCAGCGGGCCGGGTAGCAAATCTGCATCAGACGAT           | 35 |
| 41[56]  | 44[61]  | GCCCTGCGGCTGGTATCCCTTAGTGTCACAGAATGCG         | 37 |
| 21[91]  | 35[88]  | AACGATTAATTAATTTCCCTCAA                       | 26 |
| 38[102] | 36[93]  | ACGTATTATTACCAATAATAACGGAAGAGTTAAAATTA        | 38 |
| 36[92]  | 37[97]  | CCTGAGCTGTTAGAAATTGCGTA                       | 23 |
| 35[89]  | 38[103] | AGAAGATGATGAAACAAACATCAGAATTATAGGTTAATTATTTGC | 46 |
| 39[98]  | 43[108] | GGAGCGGAATTATCTAACATTCCGTCAATTATCTAAGCA       | 39 |
| 10[118] | 44[103] | CAGGTCAAGAACCGAGGTGAGGCGGTCAGT                | 30 |
| 10[97]  | 45[97]  | ATATTCATCCCTCACACCGCCTGCAATCATGTAAGAATACGT    | 42 |

**Table S2.** Functional strands of DNA origami for “X” type structure

| Start          | End     | Sequences 5'-3'                                              | Length |
|----------------|---------|--------------------------------------------------------------|--------|
| X_TOP          |         |                                                              |        |
| 35[77]         | 20[77]  | TTAAATTCACCGGTAATCCAAATAAGATCAGAGAGATAAGTACTAACTCAA          | 42     |
| 43[77]         | 12[84]  | CCTGTGCTGCTCGTTCCAATGAAACCATAACCAGAGACTAACTCAA               | 35     |
| 45[77]         | 10[84]  | ATTCGTATGTGGTGCCACCGGAACCGCCAAACAAACTAACTCAA                 | 35     |
| 41[77]         | 14[84]  | AAAGGTTCCACGCATCAAAGGGCGACATCGGAAACACTAACTCAA                | 35     |
| 33[70]         | 22[84]  | CCACGGGAACGGATCGATCGGGAGAACCTCCCGACTTATTTAACTAACTCAA         | 42     |
| 39[77]         | 16[84]  | GTGGTGCTTCGTCTTACTGGCATGATTAGCGCCAAACTAACTCAA                | 35     |
| 49[77]         | 6[84]   | CCTTCACTTTCCAGAGTATTTTCGGAACCATCACCGACTAACTCAA               | 35     |
| 37[77]         | 18[84]  | CGGTCCGCTCATTGTTGCCACAAGAATTTACCCAAACTAACTCAA                | 35     |
| 53[70]         | 2[84]   | GTGCCGTAAAGCACGTTTGGATTAGACAGCCCTCAATAATAAACTAACTCAA         | 42     |
| 47[77]         | 8[84]   | TCACTGCTGGTCATCGTCCTCATTAAGATGCCCCACTAACTCAA                 | 35     |
| X_Left-handed  |         |                                                              |        |
| 44[102]        | 42[91]  | ATTAAGAGCCGCTCAAAATCACCGGACGATAGCTTTAGGA ACTAACTC            | 40     |
| 26[55]         | 29[55]  | AACTAGCTGTAAACATCAAAAATAATTGGGAACAAACGGCG ACTAACTC           | 42     |
| 22[62]         | 31[55]  | AGCTAAATCGGTTGTGCAATGGCCAGCTCGCCATT ACTAACTC                 | 35     |
| 18[83]         | 35[76]  | AAGAATAATGCTGTTTCGCAAAGCCGCAATCAAAC ACTAACTC                 | 35     |
| 26[27]         | 29[34]  | GTTGATATTTGAGAGATCTACAGTATCGTCGGAT ACTAACTC                  | 35     |
| 45[98]         | 48[105] | GGCACAGACAATATAGATAGACTCATGGATATCCA ACTAACTC                 | 35     |
| 1[140]         | 51[139] | AGCTTGCACTTCAACAGTTTTTAGTAAGGGCGCTGTATAAC ACTAACTC           | 42     |
| 2[125]         | 51[118] | GTGAGAATAGAAAGTTTTGTTACGCTTATGGTT ACTAACTC                   | 35     |
| 16[83]         | 37[76]  | AGACAGCGTTTTAATGCTGAACGTCGCTGCAAACG ACTAACTC                 | 35     |
| 14[104]        | 41[87]  | ACCATTAGCAAGGCTCAACCGTGCGGAACAAAGTCTCAA ACTAACTC             | 39     |
| 22[41]         | 31[34]  | AACATTATGACCCTAGAACCCGTGCTGCGGTGCCG ACTAACTC                 | 35     |
| 10[118]        | 44[103] | CAGGTCAAGAACCGAGGTGAGGCGGTGTCAGT ACTAACTC                    | 30     |
| 3[105]         | 53[118] | ATCTAAAGAACAACGCTCCAAAAGGAGCACAATGAATTTAGA ACTAACTC          | 42     |
| 2[132]         | 53[139] | CAGCGGATGTATCGGTTTATCTTGATACGCCGGCG ACTAACTC                 | 35     |
| 8[107]         | 49[118] | GCCATGAAAGAGTATAGAACCGCCACCCTCAACGGTACGTCTGTC ACTAACTC       | 45     |
| 14[83]         | 39[76]  | GTCACAAATGCTTTTCAAATAACCAGCTACCGTCG ACTAACTC                 | 35     |
| X_right-handed |         |                                                              |        |
| 35[89]         | 38[103] | AGAAGATGATGAAACAAACATCAGAATTATAGGTTTAATTATTTGC ACTAACTC      | 46     |
| 10[83]         | 43[76]  | ATAAAGAACAACATTCGTTTACTGCGCCTGCGCG ACTAACTC                  | 35     |
| 6[83]          | 47[76]  | TACTCACCAGGCGCCAGAACGTCGGGAAGTTGCGC ACTAACTC                 | 35     |
| 46[55]         | 48[63]  | GTTATCCGTTGAGGATCCCCGGGTACCGTCTGTGTAATTGCACCTGTC<br>ACTAACTC | 49     |
| 1[35]          | 51[34]  | CAGAGGCCCAACCTAAAACGATTTGACCGGCGAAAATCGGCA ACTAACTC          | 42     |
| 1[56]          | 51[55]  | ACTTTTTCGTAATGCCACTACCAAGCGCACGTGGATCAAAAG ACTAACTC          | 42     |
| 46[48]         | 49[55]  | GCTCACAAATGAGTAATGAATCTTTTACCAGTG ACTAACTC                   | 35     |
| 26[132]        | 29[139] | TATCCCAAGAACAAGCAAGCCAATAAGGCGCTCAA ACTAACTC                 | 35     |
| 2[27]          | 53[34]  | AAGAGGCGGTAGCAACGGCTATCGTCACACTACGT ACTAACTC                 | 35     |
| 16[97]         | 39[97]  | TTTACCAAGACTCCAAACAGAAATAATTCAAACCACCAGAA ACTAACTC           | 42     |

|         |         |                                                              |    |
|---------|---------|--------------------------------------------------------------|----|
| 22[125] | 31[118] | AGCCTAATTTGCCATAAATCAATATAACCTTTTTTC ACTAACTC                | 35 |
| 8[83]   | 45[76]  | CTGCCTAGTAAATTGAACTAAAGCTGTTAGCTCGA ACTAACTC                 | 35 |
| 21[140] | 31[139] | AGAATAACGCTAACGAGCGTCTTTGCACACCTCCGTAATTC ACTAACTC           | 42 |
| 26[118] | 29[118] | TTACGAGTAAACAACGAGCCAGTAATAAATACAAATTCTTAC ACTAACTC          | 42 |
| 2[48]   | 53[55]  | GAAGGCATTTGAGGACTAAAGTTAAAGGATCAAGT ACTAACTC                 | 35 |
| 53[56]  | 50[49]  | TTTTTGGTTAAAGAGAAACAAAATTGTGTCGAAATTTGAAACCACGCT<br>ACTAACTC | 49 |

**Table S3.** Functional strands of DNA origami for “L” type structure

| Start          | End     | Sequences 5'-3'                                               | Length |
|----------------|---------|---------------------------------------------------------------|--------|
| L_Left-handed  |         |                                                               |        |
| 26[118]        | 29[118] | TTACGAGTAAACAACGAGCCAGTAATAAATACAAATTCTTAC ACTAACTC           | 50     |
| 26[132]        | 29[139] | TATCCCAAGAACAAGCAAGCCAATAAGGCGCTCAA ACTAACTC                  | 43     |
| 22[125]        | 31[118] | AGCCTAATTTGCCATAAATCAATATAACCTTTTTTC ACTAACTC                 | 43     |
| 21[140]        | 31[139] | AGAATAACGCTAACGAGCGTCTTTGCACACCTCCGTAATTC ACTAACTC            | 50     |
| 19[140]        | 34[133] | TCTTACCACGGGAGAATTAACTACAGAGATATGTG ACTAACTC                  | 43     |
| 20[132]        | 35[139] | TGAACACAATAGCAATAGCTAATACCAATTAACAA ACTAACTC                  | 43     |
| 16[139]        | 36[140] | GAATAAGATACATATGGAAGGACAGTACCTTTTACGCTTTGA ACTAACTC           | 50     |
| 14[118]        | 39[125] | CCAGTAGGGTAAATGTTTGAGATCATATTCCTGAT ACTAACTC                  | 43     |
| 43[140]        | 40[133] | GAACCTCTTGCCAAGTCAGACCATTTGGGAATTAGTTCATTACGAACGT<br>ACTAACTC | 57     |
| 9[140]         | 43[139] | ACATGGCCGCCGCCAGCATTGACCACCCACCAGCCCTTGCT ACTAACTC            | 50     |
| 41[126]        | 45[139] | GAGGATTGTTGAAAAGCATCAAGAAGATTAGTCTTTAATGCG ACTAACTC           | 50     |
| 7[133]         | 46[140] | CAAGAGAAGAACTCCAATCGTCTGAAATACGACCA ACTAACTC                  | 43     |
| 7[140]         | 47[132] | AGGATTAGTAATAAGTTTTAAGCGTCATGTAATAAAAGGGACTGACGCT<br>ACTAACTC | 57     |
| 5[133]         | 48[140] | AGAGCCATTAAGGACCGTTGTAGCAATGAGTAGA ACTAACTC                   | 43     |
| 49[119]        | 51[132] | CATCACGCAAATTAGATTTTACGAGCAC ACTAACTC                         | 36     |
| 2[125]         | 51[118] | GTGAGAATAGAAAGTTTTGTTACGCTTATGGTT ACTAACTC                    | 43     |
| 1[140]         | 51[139] | AGCTTGCACTTCAACAGTTTTTAGTAAGGGCGCTGTATAAC ACTAACTC            | 50     |
| 3[105]         | 53[118] | ATCTAAAGAACAACGCTCCAAAAGGAGCACAATGAATTTAGA ACTAACTC           | 50     |
| 2[132]         | 53[139] | CAGCGGATGTATCGGTTTATCTTGATACGCCGGCG ACTAACTC                  | 43     |
| L_Right-handed |         |                                                               |        |
| 26[27]         | 29[34]  | GTTGATATTTGAGAGATCTACAGTATCGTCGGAT ACTAACTC                   | 43     |
| 26[55]         | 29[55]  | AACTAGCTGTTAAACATCAAAAATAATTGGGAACAAACGGCG ACTAACTC           | 50     |
| 22[41]         | 31[34]  | AACATTATGACCCTAGAACCCGTGCTGCGGTGCCG ACTAACTC                  | 43     |
| 22[62]         | 31[55]  | AGCTAAATCGGTTGTGCAATGGCCAGCTCGCCATT ACTAACTC                  | 43     |
| 37[35]         | 34[28]  | AAGGGTAAAAAAGAACGAGCGAGCTGAAAAGGTCATCCAAGAATTTG<br>ACTAACTC   | 57     |
| 20[23]         | 37[34]  | TCAATCCCAGAAGTTTTTGCTCCTTTGATACGTGCCAGTGATG ACTAACTC          | 53     |
| 36[55]         | 39[48]  | GTGTACATCGACATAAGTTAAATCCTCACAGCAAC ACTAACTC                  | 43     |
| 42[41]         | 40[28]  | CGTAACTCCAATAAAATCAAAAATCAGAGCGGATGCAGGCG ACTAACTC            | 50     |
| 16[34]         | 42[28]  | TCCAACAGGTCAGGGAAGCAAGTCTTATAGACTGGATAGCGGGCATCA<br>ACTAACTC  | 57     |
| 10[34]         | 43[41]  | GGAATACAAGGAATGGGTTTCGGTGCCGGTGCCCC ACTAACTC                  | 43     |
| 10[55]         | 45[48]  | AGATTCAAGAGCAACCGTTTTACGGTCCCTCACA ACTAACTC                   | 43     |
| 9[42]          | 48[49]  | TGGGAAGCAACTTTGAATAAGGCTTGCCCTGCATT ACTAACTC                  | 43     |
| 46[48]         | 49[55]  | GCTCACAAATGAGTAATGAATTCTTTTACCAGTG ACTAACTC                   | 43     |
| 53[56]         | 50[49]  | TTTTTGTTAAAGAGAAACAAAATTGTGTGCAAATTTTGAACCACGCT<br>ACTAACTC   | 57     |

|       |        |                                                     |    |
|-------|--------|-----------------------------------------------------|----|
| 1[35] | 51[34] | CAGAGGCCCAACCTAAAACGATTTGACCGGCGAAAATCGGCA ACTAACTC | 50 |
| 1[56] | 51[55] | ACTTTTTCGTAATGCCACTACCAAGCGCACGTGGATCAAAAG ACTAACTC | 50 |
| 2[27] | 53[34] | AAGAGGCGGTAGCAACGGCTATCGTCACACTACGT ACTAACTC        | 43 |
| 2[48] | 53[55] | GAAGGCATTTGAGGACTAAAGTTAAAGGATCAAGT ACTAACTC        | 43 |

**Table S4.** Staple strands of DNA origami Plate

| Start   | End     | Sequences 5'-3'                                   | Length |
|---------|---------|---------------------------------------------------|--------|
| 12[139] | 10[126] | AGTTGAGAAACGAAATTAAGAGGCTGCACGTATAAAACACTA        | 42     |
| 12[55]  | 10[42]  | CCTCAAATTACCCTGTGAATTTGTGAGAAAACAGCGGTAATA        | 42     |
| 54[69]  | 11[62]  | CATAAAATTTCTGCAAAAGAAGTTTTGCTCAGCCA               | 35     |
| 55[119] | 12[119] | CAGTGCCTACATGGGTCCAGACGACGTAATGCATTTTCGAGC        | 42     |
| 55[151] | 12[140] | CTAATTACGAGGCATAGCCACATTATTCATC                   | 31     |
| 10[41]  | 12[28]  | GTAAAATTCGTCATAACAGTTCAGAAAA                      | 28     |
| 55[56]  | 12[56]  | ACTTAAAAAATCCCGAATAAACACCGGATTACCAGTATAACC        | 42     |
| 55[87]  | 12[77]  | TTAAAAAATAGCGAGAGGGGCTTAACGTTATA                  | 32     |
| 55[105] | 12[91]  | AGTGCCTTACCAGACGACGATATTTAACTATAAAGTATAGTA        | 42     |
| 16[118] | 13[111] | CATCCTAATTTACGCAACAATGCTAATGGGTAAAG               | 35     |
| 16[55]  | 13[48]  | GTTTTAATTCGAGCAAAGACTTCAGAAGCAGGTCT               | 35     |
| 52[125] | 14[119] | TATCACTCCTGAACAAGATTAACAATAAACAAC                 | 35     |
| 11[28]  | 14[35]  | TGCGGAAGTTTAGAAAAAAGAGACGCAGGATAGACCAAAAATCAAAGCG | 49     |
| 53[56]  | 14[56]  | AAAAAGCGTTCGGTCTAGTTAATTTACGTTAAATAAGACT          | 42     |
| 53[84]  | 14[77]  | TGAAGGGATGGGCGGTTGTGTTTACTAGTGTGATA               | 35     |
| 55[98]  | 14[91]  | CGGGGTCGGAGTGTGACAAAACAGAACGCGAAATA               | 35     |
| 50[125] | 16[119] | GAGCCGCTTTCCTTATCATTTATAAAATAATATCC               | 35     |
| 52[132] | 16[140] | CGAGAGAGTAGACTCCTCAAGAGAAGGACGGATAATGGCTCAAATTACC | 49     |
| 54[34]  | 16[35]  | TTTCTCCGTACAGCGCCATGTCCGGAAACAAGCCCGTCAAAG        | 42     |
| 51[56]  | 16[56]  | CGCGGTCGGAACGTACATATAACTATATTCAAATATATTTGC        | 42     |
| 51[87]  | 16[77]  | GCCAATGGTAAAGTTAAACCTAAAGCGAGAA                   | 32     |
| 53[98]  | 16[91]  | AGTCTCTTCATTAATGTTTATAGCATGTAGAAGAC               | 35     |
| 46[111] | 17[104] | ATCGGCACATCTTTACCGGAAGCCACCCACCACCAGAGCACCAATC    | 49     |
| 52[34]  | 18[35]  | GGATAACCGACGGCCAGTGCCGGTAACGAACAGGTTGATAAG        | 42     |
| 48[62]  | 18[56]  | GGCAGCAGCAGAAGAGTCAATTTAGGTTGGGTTCT               | 35     |
| 49[84]  | 18[77]  | TCTGGCGAGCTCCGGCCAGAGCTGATGCTTTTAAC               | 35     |
| 22[118] | 19[111] | AACCTCCGACTAAGCTTATCATAGCAAAGCAAGC                | 35     |
| 48[125] | 19[118] | GAACCAGATTTTCATCGTATGAATCCAAGAACGGGTATTAACGTTTTT  | 49     |
| 25[42]  | 19[48]  | AATAGTAATTTCAAATGGTCTCTGCGATTCCATAACATGTTTTGCTGA  | 49     |
| 48[118] | 20[126] | AGCCACCTCATAATCAAATCTGTAGCGCTAAGAACGCGACAGCGGAAT  | 49     |
| 48[132] | 20[140] | ATAGGCGCTAACCGCCACCTCAGAACCGGATAGCAGTGAATATCAACG  | 49     |
| 50[34]  | 20[35]  | CCAGGTCTGGCGAAAAGGGGAAGGGCGAGCTTAATTAATA          | 42     |
| 47[56]  | 20[56]  | CGGTGGTATTGCAGTGTCTGTAAATCGTATTAAGACGCTGTG        | 42     |
| 47[87]  | 20[77]  | GCCCCGTCAGCAGCAACCTTATCAATAGCGAT                  | 32     |
| 49[91]  | 20[91]  | CCACCCTCAGAACCCCGCCTCGAGAACAGCAAATCAGTCCTT        | 42     |
| 44[125] | 22[119] | GAAACGTTGAAGCCTTAAAGAATGGCGTTTTAGCG               | 35     |
| 48[34]  | 22[35]  | ATCGGTGAAAGCGCCATTCGCCAGCTTTAGTTTCAACGAGTA        | 42     |
| 45[56]  | 22[56]  | TTTCGCAGCTGGTATGGAACAAGAGTCCAATAACCTTGCTAT        | 42     |
| 45[84]  | 22[77]  | GCGGTAACCTGGAGGTGTCCAAATTAATAATATAT               | 35     |
| 43[112] | 24[126] | TTACCATTAGCAAGTCACCGTTAACGAGCGTCTTTTTTCAAG        | 42     |



|         |         |                                                    |    |
|---------|---------|----------------------------------------------------|----|
| 44[132] | 24[140] | TGTATCGAGCCCTCATAGTTAGCGTAAACGTAAATGCAGATGACGAACTG | 49 |
| 46[34]  | 24[35]  | CCGGCACCGACGACAGTATCGGGGCGCATTTCGCATTGGGG          | 42 |
| 25[56]  | 24[49]  | TAGTGGTCCGAAATGTTCCAGTTTGTAGCTAT                   | 35 |
| 43[87]  | 24[77]  | CTCAGTATGAGCCGGGTCAAGAACGATAGGGT                   | 32 |
| 45[91]  | 24[91]  | TCAGTAGCGACAGATCGATAGAAAAGGGCAGCTACAATGAATA        | 42 |
| 41[119] | 26[126] | AAGGTGAAAGACAAAATAAGAAACGAGAACTTCCA                | 35 |
| 44[34]  | 26[35]  | TCGTAACGGATTGACCGTAATAGTAACATTCTACTACAGGCA         | 42 |
| 41[56]  | 26[56]  | ATGCCGGGTGTCACAGCACCGCCTGGCCTCTGTTGATGAC           | 42 |
| 42[83]  | 26[70]  | TGGTGTGAATCCCTCCAGCAGGCGAAAA                       | 28 |
| 43[98]  | 26[91]  | CACCAGTATTTGGGTATCCTGAAATAAACACGCTG                | 35 |
| 38[111] | 27[111] | GACACCAAAATTCAACATTCAACCGATTCAATTATTTATCC          | 42 |
| 39[119] | 28[119] | TACCAGCAAAAGAAACAGGGAAGCGCAAGATTTTTGTTTAA          | 42 |
| 40[132] | 28[140] | TCGGTCAATGAATAATAATTTTTTCACGAGCCTTTCATCGCCAACAAAG  | 49 |
| 42[34]  | 28[35]  | ACCCGTCTTCCTGTAGCCAGCCAATAGCAATAAAAAACA            | 42 |
| 39[56]  | 28[56]  | CGCCTGTCGGGGTTCAGAGAGCGGTTTCTGATTGCCCTTCT          | 42 |
| 39[87]  | 28[77]  | ATTGGGCCCCCTGCATCAAGTTGCAGAGACGG                   | 32 |
| 30[111] | 28[91]  | TGAACACAGAATAAAATGAAAATAGCAGCCCTTTT                | 35 |
| 36[125] | 30[119] | AACTGGCATATCAGAGAGAGTAAATTAGACGGGAG                | 35 |
| 40[34]  | 30[35]  | GAACGCCTTCGCATTAATTTCAAATATGGAGAAGGAACCCT          | 42 |
| 37[56]  | 30[56]  | GCCAGCAGTACCGACACGTTGCGCTCACCCAACGCGCGGGAG         | 42 |
| 37[84]  | 30[77]  | CGTGATATTGCGGCGGGCCGTGGGCGCCATTAAT                 | 35 |
| 39[98]  | 30[91]  | CAATAGACGGAATATACAGAGCCTGAACAATCGTG                | 35 |
| 35[98]  | 31[111] | AGGAAACGAACAAACAAGAAACAATGAATAAGCCCGTAATTG         | 42 |
| 38[34]  | 31[41]  | TTAAATTTAATCAGAAAAGCCCGTAAAAAGTAATG                | 35 |
| 34[125] | 32[119] | AAGAAAATAGCTATCTTACCGACTAACCCACAAGA                | 35 |
| 32[55]  | 32[56]  | AGGGTGACTGATAAATTAACACAACATATCACATTAATTGAA         | 42 |
| 35[87]  | 32[70]  | GTAGGTGCCTCCTCACAGTTTCCAGATGAGTGAGCTAAC            | 39 |
| 37[98]  | 32[91]  | TAGAAAATTATTACTCAGAGGAATAATAAGCTGGG                | 35 |
| 31[140] | 33[146] | CTACGAATAAACGGGTAAAATAATGAGGACTAAAG                | 35 |
| 36[34]  | 33[48]  | CTAGCATAGAGTCTGGAGCAATTTTGAGTTCAACCGTTCTAG         | 42 |
| 32[41]  | 34[28]  | CGGAGACAGTCAAAATATGATAAGATCTA                      | 28 |
| 34[90]  | 34[91]  | GAGTGAAATTGTTAGAAGCATAAAGTGTAAGCAGGTTACCA          | 42 |
| 35[140] | 35[139] | CAGCAGCCTACAGAGGCTTGCCCTTTTAAAGATCGTCACCCT         | 42 |
| 33[147] | 35[150] | ACTTTTTCATGA??GAGGGTAGCAACGGGAAA                   | 32 |
| 35[56]  | 35[55]  | GAATTCGCATGCCGGAGAGGGTAGCTATACAAGAGAATCGTC         | 42 |
| 39[140] | 36[133] | TTTCGAGTGCGCCGCTTTGACCAAAAGAATACACTAATGCCACCGCTTT  | 49 |
| 36[132] | 36[140] | TGCGGAGATACCATCGCCACGCATAACTTAAAGG                 | 35 |
| 32[118] | 37[111] | ATTGAGTATAGCAAGTAAGCAGATAGCCGCAATAAAGACTCCTACATAC  | 49 |
| 28[118] | 37[125] | CGTCAAACATAAAAAACGAAAATAAAGGTGGCAAC                | 35 |
| 32[48]  | 37[55]  | GAAAGGCTGTAGGTAAAGATTGCATGAACGGTAATCCAAAAACAGGACT  | 49 |
| 33[70]  | 37[69]  | CGAGCCGTCCGCTCACAATTCTAATCATTCCCCGGCGCGTGC         | 42 |

|         |         |                                                    |    |
|---------|---------|----------------------------------------------------|----|
| 28[76]  | 37[83]  | GCAACAGGCGTATTTTTACGCTGTTCTTCGCGTC                 | 35 |
| 30[90]  | 37[97]  | CCAGCTGAGGGTGGTTTTTTTAGTTTATGCAAACG                | 35 |
| 26[125] | 39[118] | GAGCCTAATTTGCCCAATCCAAAGGGCGTATGGTT                | 35 |
| 28[139] | 39[139] | TACAACGCACTCATACAATGACAACAATGCTTATCAGCTTGC         | 42 |
| 35[151] | 39[150] | GACCAGGGAGCGATATACGATAGTGTGA                       | 28 |
| 28[55]  | 39[55]  | AAATCGGTTCAACGTTAGATTGTATAAGTTGTAAATCAGCG          | 42 |
| 43[140] | 40[133] | AACAACCTGAACAACACGAGGCACCTGCTCCATGTTTTTGTATAATTGTA | 49 |
| 24[125] | 41[118] | ATTAGTTGCTATTTCCAACGCCACCGACTTCATTA                | 35 |
| 26[55]  | 41[55]  | ATCCAATAGCATAATGCTCATTTTTTAATTTTCATCAACATAG        | 42 |
| 26[90]  | 41[97]  | GTTTGCCTATAAATCAAAATTAATTAGAGGTAAAT                | 35 |
| 38[69]  | 42[56]  | GTCATACGCACTCTCAGCGCAGTTACCTAATCGTTAACGGCA         | 42 |
| 24[76]  | 42[84]  | TGAGTGTTCGGCAATTCAGCAGCAGCCAGCGGTGCCGGTGAAGCTACAC  | 49 |
| 24[139] | 43[139] | ACCAACTAGCCGGATAAAGGAATTGCTAGCGGGATTTTGCTA         | 42 |
| 39[151] | 43[150] | ATTCAAAAGGTTGAAAATAGAAAGTTCA                       | 28 |
| 25[49]  | 43[55]  | GTAGCATTCTAAATGTGAGCGGGGATAGGTCACGG                | 35 |
| 26[111] | 44[112] | AGTTACAAATCTTATGCACCCGATGCGGGAGGTTTCACCAAT         | 42 |
| 47[140] | 44[133] | GTAACACTGTAGCATCTTGACGCTGGCTGACCTTCAAGAGGAAATTTTC  | 49 |
| 41[98]  | 45[111] | ATTGACGGAAATTATTGAGCCAGCACCAGAAACCAATCAAGT         | 42 |
| 20[125] | 45[125] | CATTACCGCGCCACGGTATTCGTTTTCTTGCCTTAGCGTC           | 42 |
| 22[55]  | 45[55]  | TCCAATAATAACCATGTTGGTGTAGATGCCTCAGGAAGAGC          | 42 |
| 20[76]  | 45[83]  | AGCTTAGCGCTATTGCATCAGCGCCGGGCGCGGTT                | 35 |
| 24[90]  | 46[91]  | GCCCCGAGTGGACTCATAAATCTTCCCTTAGAAAATTCATAGC        | 42 |
| 47[98]  | 46[98]  | CGTTTGCTTTTCGG                                     | 14 |
| 20[139] | 47[139] | TAACAAAAGAGTAATTCACAGACAGACACAACCCATGTACC          | 42 |
| 43[151] | 47[150] | ACAGACGTTAGATCTAACAACGCCTGAG                       | 28 |
| 20[55]  | 47[55]  | TAGCTCATAACAGTGCTCGCACTCCAGCCATTCAGGCTGCGT         | 42 |
| 51[140] | 48[133] | GTATAGCTTAGTACAGATGGTCAGAACGAGTAGTACTCATTCAAGCCCA  | 49 |
| 43[56]  | 48[63]  | GTAAAGGTTTCTTCCCTGCGCTCAATCCGGGGTCGCCATCTGCCAAC    | 49 |
| 18[111] | 49[125] | CCAAGTAAATAATCGGCTGTCCACCAGATCAGAGCCACCACC         | 42 |
| 18[55]  | 49[55]  | TTAATTGATATAATCCGCAACTGTTGGGATGTGCTGCAAGCG         | 42 |
| 16[76]  | 49[83]  | AACTTTTGTAATGCACATCCCAGCGTGGTGCTGG                 | 35 |
| 18[104] | 50[91]  | CCGCACTCAGAGAGACTACCTAAATCCAATCGCAACGCCGCC         | 42 |
| 16[139] | 51[139] | TTATGCGGGGCTTGCGCCACCCTCAGCATTGGGTTGATATAA         | 42 |
| 47[151] | 51[150] | TTTTTTTCAGGCCACCCAGGAGGTCCGG                       | 28 |
| 18[48]  | 51[55]  | CTCCTTTCAGGATTAGAGAGTGCGCGATTAAGTTGAAGCTTTCAGAGAA  | 49 |
| 55[140] | 52[133] | ATGCCCTGAAAGTCTAACGGGAAAAATCTACGTTTAAAGAACGTGCCGT  | 49 |
| 12[118] | 53[125] | CAGTAATTAATTCTCTTTTGACCGTTCAGTAAGC                 | 35 |
| 49[56]  | 53[69]  | GACTTGTAGAACGTTTCATAACCGTTTTTGATTGCCCGCACAG        | 42 |
| 12[76]  | 53[83]  | CAAATTCATCATAAACATCGAGCGGCCTTTAGTGA                | 35 |
| 14[90]  | 53[97]  | CCGACCGAAAAAGCCTGTTCCACTGGTAAAAGCGC                | 35 |
| 51[98]  | 54[105] | GAGGTTGAGGCAGGTAAATCCGAATTTATGATACA                | 35 |

|         |         |                                            |    |
|---------|---------|--------------------------------------------|----|
| 12[111] | 55[118] | AAGAGAAAACGCCAACATGTACCTCGTTTGAGTAA        | 35 |
| 10[125] | 55[139] | TCATAACATTTAGGCAGAGTTAGGAATATAAGAGCACAGTTA | 42 |
| 51[151] | 55[150] | AATTACCAGGTTAGGATTGAAACACTGC               | 28 |
| 12[48]  | 55[55]  | TGCTTAAAAATATTCATTGAACAGAGGGGGATCAA        | 35 |

**Table S5.** Staple strands of DNA origami Arm

| Start  | End    | Sequences 5'-3'                                   | Length |
|--------|--------|---------------------------------------------------|--------|
| 5[105] | 0[112] | GCCATTGAATATCCTACTTCTTCACGCACGGTACGCCAGAATGAGCCGT | 49     |
| 6[153] | 0[140] | GTATTAACAGAAGATTA AAAACGCGAACAAATATCTTTAGGA       | 42     |
| 3[42]  | 0[52]  | GTTTGGAAGGAGCTTTTGC GGAACAAA ACTC                 | 32     |
| 9[63]  | 0[73]  | AAAACAACAAACAATTTCGACAGAGAGCGGGAGCTAAACAGGAGACT   | 46     |
| 5[21]  | 3[34]  | AAATAAATCAAAATTT CATCAATATAAT                     | 28     |
| 6[121] | 4[126] | GGAAAAACGCTCATGGCAA ACTA                          | 24     |
| 6[37]  | 4[42]  | ATACGTAGATTTTCAGGGAAGGGT                          | 24     |
| 4[118] | 5[104] | TGCTGGTCAACAGGTTATTTACATTGGCAGATTCCACCGCCA        | 42     |
| 2[118] | 6[122] | CTGTCCATTGATTATCTGACCGACCAGTAATAAAAAAAT           | 39     |
| 3[161] | 6[154] | AATATCACCAGCAGCAAATGAACAGTGC GCGGTCA              | 35     |
| 4[34]  | 6[21]  | TACCATAGAAATTGTACAGTAACAGTAC                      | 28     |
| 6[48]  | 6[49]  | ACGTCAGGCCTGATTGCTTGGGGTCGAGTGGCGAGAAAGGTA        | 42     |
| 2[76]  | 6[77]  | GCTTCCCTACAGGCCATCACA AAGCACTAAATCGGACGGGG        | 42     |
| 2[160] | 7[160] | AATATCTAACCTCAATCGCCATAAAACA                      | 28     |
| 4[97]  | 7[97]  | TATAGCGGTCACGCCTATGGTTGCTTTTACCTTTTAAAGGGA        | 42     |
| 2[139] | 8[126] | GAGGCCATGCCTGACGCCAACAGAGATA                      | 28     |
| 0[135] | 8[140] | TAAATTAGTCTTTAATGTACCGAA                          | 24     |
| 2[55]  | 8[42]  | CCACCAGTTATACTTTTGAATACCAAGT                      | 28     |
| 0[51]  | 8[56]  | GTAAAACAAACATCAAGAAGTTT                           | 24     |
| 4[76]  | 8[63]  | AACCACCAGCGGGCAAAGCCGGCGAACGGTGCCGTCCAAATC        | 42     |
| 5[77]  | 8[84]  | GCTAGGGCGCTGGCAAGTGTTCGATTTAGAGCTTGAACCCTTTACT    | 49     |
| 1[140] | 9[160] | CAAATCAACAGTTGAAAGGAATTATCTATGATAGC               | 35     |
| 2[97]  | 9[97]  | CGTGACGAGCACGTTAAAGGGATTTTAGTTGAGGTCATTG          | 42     |

**Table S6.** Staple strands of AuNR captures (arm)

| Start  | End    | Sequences 5'-3'                                               | Length |
|--------|--------|---------------------------------------------------------------|--------|
| 9[126] | 2[119] | AATGGCTCAACTAATAGATTACCTGAGAAAAGAGT ACT AAC TCA AAA           | 44     |
| 3[140] | 2[140] | GTATCACCTTGCTGGGTCAGTTGGCAGT ACT AAC TCA AAA                  | 37     |
| 9[42]  | 2[35]  | GATGATGTAAATCCTTTGCCATTATCAGGAATTA ACT AAC TCA AAA            | 44     |
| 3[56]  | 2[56]  | TCCTTAATGCGCCGTCGTTAGAATCAAA ACT AAC TCA AAA                  | 37     |
| 9[84]  | 2[77]  | AACAATTATTTAGAAGTATTAGCCGATATAACGT ACT AAC TCA AAA            | 44     |
| 9[98]  | 2[98]  | AAAATACGTGGCACCAATAGATAATACAACAGGAAAATTAAC ACT AAC TCA<br>AAA | 51     |
| 9[112] | 4[119] | AGACAATATTTTTGGAACCCTGTAATAATCGGCCT ACT AAC TCA AAA           | 44     |
| 4[139] | 4[140] | AAGAACTAAATACCTACATCCGCCTGCAAAAATCTAAAGCAG ACT AAC TCA<br>AAA | 51     |
| 0[30]  | 4[35]  | CGTCCTGAGCAAAAGAATACAAAACCTGATTTAGAACC ACT AAC TCA AAA        | 47     |
| 4[55]  | 4[56]  | AATAATGTTAAGGGAAGAAAGCGAAAGGACACCCGCCGCGT<br>ACTAACTCAAAA     | 51     |
| 0[72]  | 4[77]  | TTAAATTAATTACATTTACGTGAAGCGCGTATGCGCGT ACT AAC TCA AAA        | 47     |
| 7[98]  | 4[98]  | GCCACCAGTCACACTGAAAGCGTAAGTTGTAGCAAAGAACAA ACTAACTCA<br>AAA   | 51     |

**Table S7.** Staple strands of AuNR captures (plate)

| Start  | End    | Sequences 5'-3'                                               | Length |
|--------|--------|---------------------------------------------------------------|--------|
| 30[76] | 35[86] | GAATCGGTGCCCCGCTTGAGGAGGTCATAGCTGTTTCCT ACT AAC TCA AAA       | 47     |
| 32[90] | 35[97] | GTGCCTATCGGGAAACCTGAGGCAGTATGAAACCG ACT AAC TCA AAA           | 44     |
| 27[70] | 39[86] | CTGAGAGGACGATCGTGGTGCTGCGGCCAGA ACT AAC TCA AAA               | 40     |
| 28[90] | 39[97] | CACCAGTGCAAGCGGTCCAGCGAGGGAGTCACAAT ACT AAC TCA AAA           | 44     |
| 22[76] | 43[86] | GTGAGTGACTATTAACCTGTTGGCTCGTCATAAACATCC ACT AAC TCA AAA       | 47     |
| 21[98] | 43[97] | ATAGAAGAACCGTCTATCAACCAACGTCCAGCACCGCAAAAT ACT AAC TCA<br>AAA | 51     |
| 18[76] | 47[86] | CTCCGGCAGTGAATGCAAGAACACGCAACCAGCTTACG ACT AAC TCA AAA        | 47     |
| 20[90] | 47[97] | GAAAACAAATCATAGGTCTTCCTCAGATTATTAG ACT AAC TCA AAA            | 44     |
| 14[76] | 51[86] | AATAAGGTCTTCTGCGATGCTTCGTCTCGTCGCTGGCA ACT AAC TCA AAA        | 47     |
| 16[90] | 51[97] | AAAGAACTTTAATGGTTTGCCAGCCAGATTGACAG ACT AAC TCA AAA           | 44     |
| 11[63] | 55[86] | ACGCTCAACAGTAGCTTTTGCTCATTTGCCGCCAGCAG ACT AAC TCA AAA        | 47     |
| 12[90] | 55[97] | TCATATGTTGAGAATCGCCATAAAAACCGTTTTAA ACT AAC TCA AAA           | 44     |

**Table S8.** Switching systems on DNA origami templates

| Start   | End     | Sequences 5'-3'                                                      | Length |
|---------|---------|----------------------------------------------------------------------|--------|
| 2[34]   | 0[31]   | TCATCATATTCCTGAAAGTTTGAGTAACCGAA<br>TTTTTT TGTAGTTG                  | 1R-0   |
| 6[142]  | 6[143]  | TGACGCTCAATCGTCTGGGGACATTCTGGAACCACCAGCATT<br>TTTTTT TGTAGTTG        | 1R-6   |
| 14[55]  | 53[55]  | CCAATACA ACTACA TTTTTT<br>ATTATAGTCAAATACAGTGGAGCCGCCATTACCAGTCCCGAA | 1R-14  |
| 30[118] | 35[125] | CCAATACA ACTACA TTTTTT<br>AATTAACAGCGCTAATGATTATAACGGAATACCCA        | 1R-30  |
|         |         | TGTAGTTGTATTGGTGAAGT                                                 | R'     |
|         |         | ACTTCACCAATACA ACTACA                                                | R      |
| 3[126]  | 0[136]  | CATCACTCCGAGTAAGTGT TTTTATAATGCAC<br>TTTTTT TACTACTC                 | 1L-0   |
| 8[34]   | 6[38]   | TCGCGCAACAATAACGGATTCATGA<br>TTTTTT TACTACTC                         | 1L-6   |
| 30[55]  | 26[42]  | TCTTGTGAGTAGTA TTTTTT<br>GATAAAAATTTTACCTTTATTGTACCGCCTCAGAAATCAT    | 1L-30  |
| 14[118] | 51[125] | TCTTGTGAGTAGTA TTTTTT<br>ATGTTCAAGATAAGAAACAAATCAGACGATTGGCC         | 1L-14  |
|         |         | TACTACTCACAAGATGAAGA                                                 | L'     |
|         |         | TCTTCATCTTGTGAGTAGTA                                                 | L      |

**Table S9.** Sequence of SH-DNA on AuNRs

| Name   | Sequences 5'-3'    | Length |
|--------|--------------------|--------|
| SH-DNA | HS-TTT TGA GTT AGT | 12     |

## Reference

- 1 X. Ye, L. Jin, H. Caglayan, J. Chen, G. Xing, C. Zheng, V. Doan-Nguyen, Y. Kang, N. Engheta, C. R. Kagan and C. B. Murray, *ACS Nano*, 2012, **6**, 2804-2817
- 2 D. Shi, C. Song, Q. Jiang, Z.-G. Wang and B. Ding, *Chem. Commun.*, 2013, **49**, 2533-2535.
- 3 D. Chateau, A. Desert, F. Lerouge, G. Landaburu, S. Santucci and S. Parola, *ACS Appl. Mater. Interfaces*, 2019, **11**, 39068-39076.
- 4 K. Park, S. Biswas, S. Kanel, D. Nepal and R. A. Vaia, *J. Phys. Chem. C*, 2014, **118**, 5918-5926.
